# Supplementary material
Source: Springer Nature journal article supplement (https://www.springermedizin.de/resource/supplementary/13229_2013_83_MOESM8_ESM.pdf/9676132)

**A** Adult Whole Blood 5-HT in Males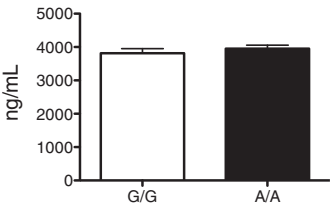**B** P7 Whole Blood 5-HT in Males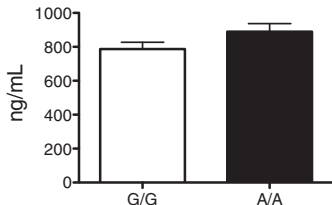**C** Synaptosome uptake (20nM 5-HT)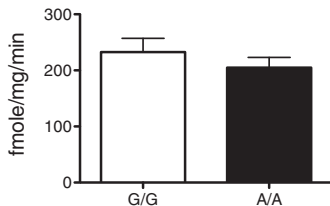**D** Synaptosome uptake (100nM 5-HT)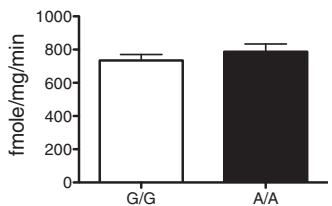**E** DOI-Induced Head Twitch Response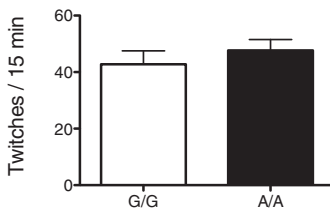**F** 8-OH-DPAT-Induced Hypothermia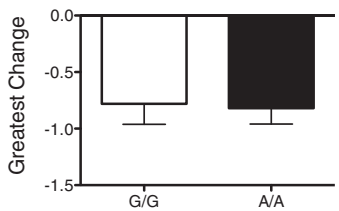

Supplement: MOESM8 [file 9676132]
